# Supplementary material for: Lkb1 aggravates diffuse large B-cell lymphoma by promoting the function of Treg cells and immune escape
Source: Springer Nature journal article supplement (doi:10.1186/s12967-022-03588-0), 2022-08-19
Supplement: MOESM5 [file 23382618]

**Supplementary Table1: The list of top 50 up and down-regulated genes**

| <b>Top 50 up-regulated genes</b> | <b>Top 50 down-regulated genes</b> |
|----------------------------------|------------------------------------|
| G0S2                             | RNVU1-14                           |
| CCL3                             | SNORD68                            |
| CXCL8                            | AP005019                           |
| CD14                             | FKBP2                              |
| CCL3L1                           | RGPD1                              |
| FPR1                             | LAIR2                              |
| TYROBP                           | SNORD89                            |
| S100A8                           | LINC02482                          |
| FOS                              | TRBV11-3                           |
| CDA                              | EID2                               |
| CCL4                             | HIST1H4J                           |
| RETN                             | PABPC1P3                           |
| CXCR1                            | ADCK5                              |
| FTH1P10                          | AC244213                           |
| IL1B                             | MT-TN                              |
| MIR22                            | TRBV16                             |
| PLBD1                            | AC025257                           |
| LILRA5                           | METTL27                            |
| SEN3P3-EIF4A1                    | TRBV7-7                            |
| TRGC2                            | JAKMIP1                            |
| HSPA1B                           | MT-TA                              |
| NFIL3                            | MT-TC                              |
| HILPDA                           | ARMC6                              |
| KLF10                            | CD52                               |
| GSTM1                            | AC006077                           |
| MTCO2P12                         | NELFB                              |
| DUSP1                            | SUN2                               |
| KIR2DL3                          | TRBV15                             |
| CD300LF                          | PI16                               |
| AL049836                         | AC073389                           |
| MIR3945                          | RNVU1-7                            |
| CD83                             | USP18                              |
| CLEC4A                           | PHBP9                              |
| NFKBIA                           | BX293535                           |
| SGK1                             | SNORA28                            |
| FTH1P7                           | AGMAT                              |
| HIST2H2AA4                       | TRAV40                             |
| TMSB4XP1                         | SIRT1                              |
| CA2                              | AC147067                           |
| FTH1P8                           | PMVK                               |

|         |           |
|---------|-----------|
| PRKCD   | PARP10    |
| HSPA1A  | NDUFAF1   |
| HAVCR2  | ABALON    |
| IER5    | AL445472  |
| SERTAD1 | TNK1      |
| GPR137B | AC079807  |
| OR7E38P | STMN3     |
| TRAPPC5 | MIF-AS1   |
| RNU6-7  | NME1-NME2 |
| FTH1P23 | AC139720  |
