# Supplementary material for: Lkb1 aggravates diffuse large B-cell lymphoma by promoting the function of Treg cells and immune escape
Source: Springer Nature journal article supplement (doi:10.1186/s12967-022-03588-0), 2022-08-19
Supplement: MOESM6 [file 23382618]

Supplementary material 1.2: The sequences of the primers used for RT-PCR.

| Primer        | 5'to3'                  |
|---------------|-------------------------|
| STK11-Forward | GAGGAGGTTACGGCACAAA     |
| STK11-Reverse | CGCAGTACTCCATCACCATATAC |
| GAPDH-Forward | GGTGGTCTCCTCTGACTTCAACA |
| GAPDH-Reverse | GTTGCTGTAGCCAAATTCGTTGT |
| ACAT1-Forward | AGACGGGCTAACTGATGTCT    |
| ACAT1-Reverse | GCGTCCTGTTCATTCGTGC     |
| HMGCR-Forward | CATAGGAGGCTACAACGCCC    |
| HMGCR-Reverse | ACCACCCACCGTTCCTATCT    |
| HMGCS-Forward | TGGGAATTGTTGCCCTTGAG    |
| HMGCS-Reverse | ACCACAGTCATGCAAAGAGAGT  |
